# Supplementary material for: Through its genoprotective, mitochondrial bioenergetic modulation, and antioxidant effects, Fucoxanthin and its metabolite minimize Ochratoxin A-induced nephrotoxicity in HK-2 human kidney cells
Source: Research Square preprint supplement (doi:10.21203/rs.3.rs-6077785/v1), 2025-04-22
Supplement: Supplementary file 1 [file 9edcddb5d3484ccddca7e639.docx]

Supplementary files


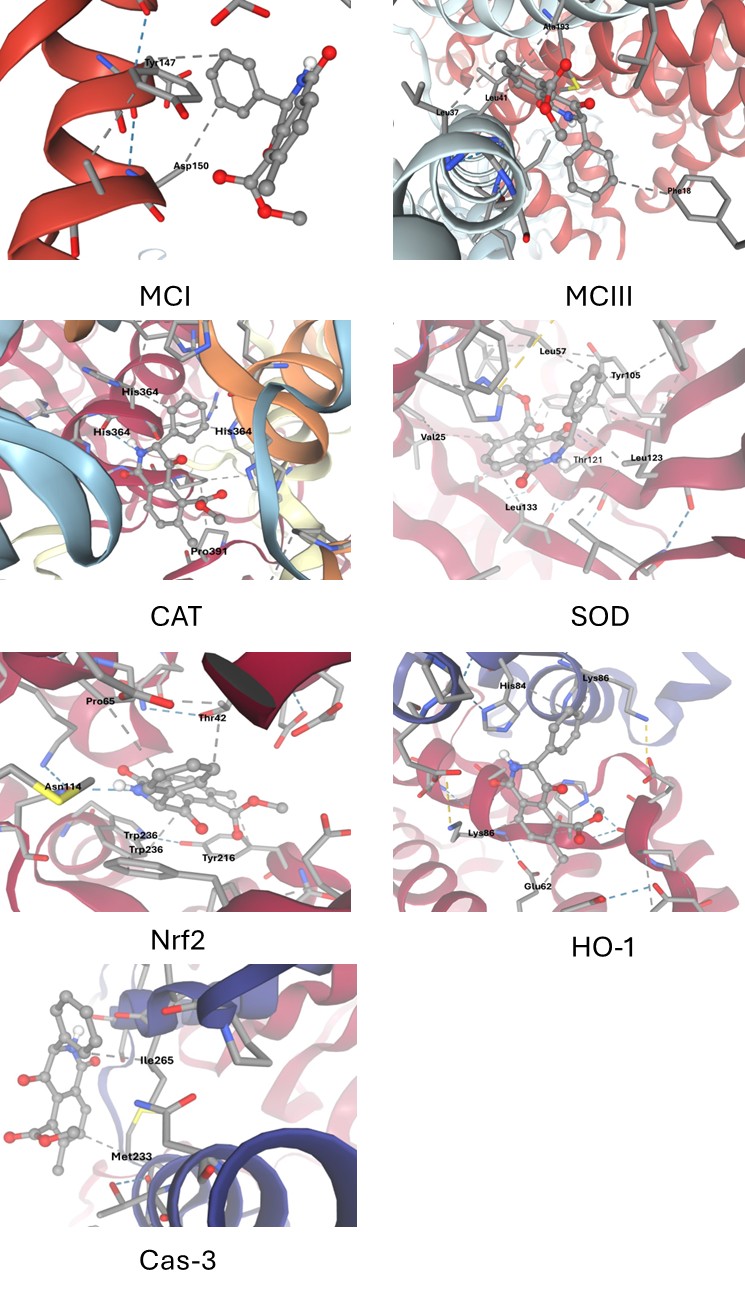


**Figure. S1: Molecular docking** **interaction of OTA with MCI, MCIII, CAT, SOD, Nrf2, HO-1, and Cas-3.** The colour coding is used to denote different types of molecular interactions: Blue (Hydrogen bonds): Indicates hydrogen bonding interactions between atoms in the protein and ligand, Gray (Hydrophobic contacts): Denotes nonpolar, hydrophobic interactions between the ligand and protein, Green (π-stacking interactions): Highlights stacking interactions between aromatic rings.

**Figure. S1: Molecular docking interaction of OTA with MCI, MCIII, CAT, SOD, Nrf2, HO-1, and Cas-3.** The colour coding is used to denote different types of molecular interactions: Blue (Hydrogen bonds): Indicates hydrogen bonding interactions between atoms in the protein and ligand, Gray (Hydrophobic contacts): Denotes nonpolar, hydrophobic interactions between the ligand and protein, Green (π-stacking interactions): Highlights stacking interactions between aromatic rings.


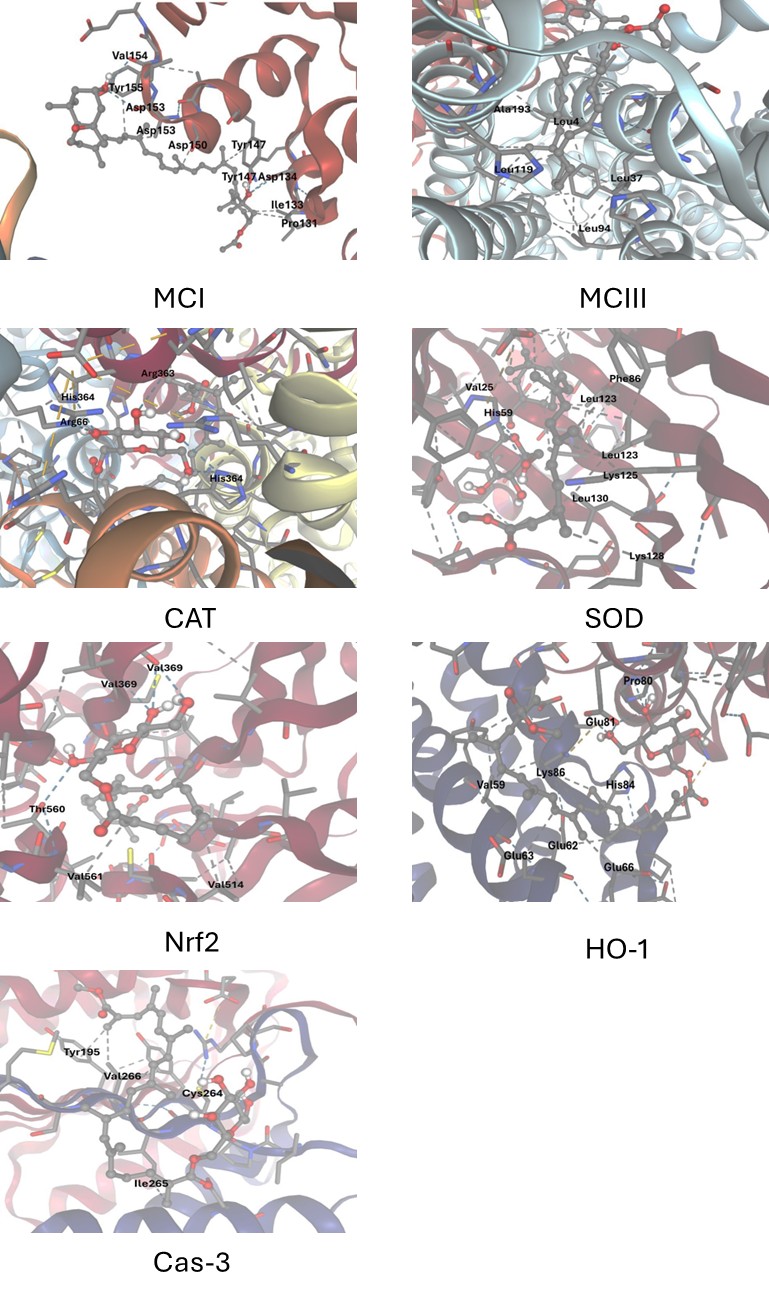


**Figure. S2: Molecular docking interaction of FX with MCI, MCIII, CAT, SOD, Nrf2, HO-1, and Cas-3.** The colour coding is used to denote different types of molecular interactions: Blue (Hydrogen bonds): Indicates hydrogen bonding interactions between atoms in the protein and ligand, Gray (Hydrophobic contacts): Denotes nonpolar, hydrophobic interactions between the ligand and protein, Green (π-stacking interactions): Highlights stacking interactions between aromatic rings.


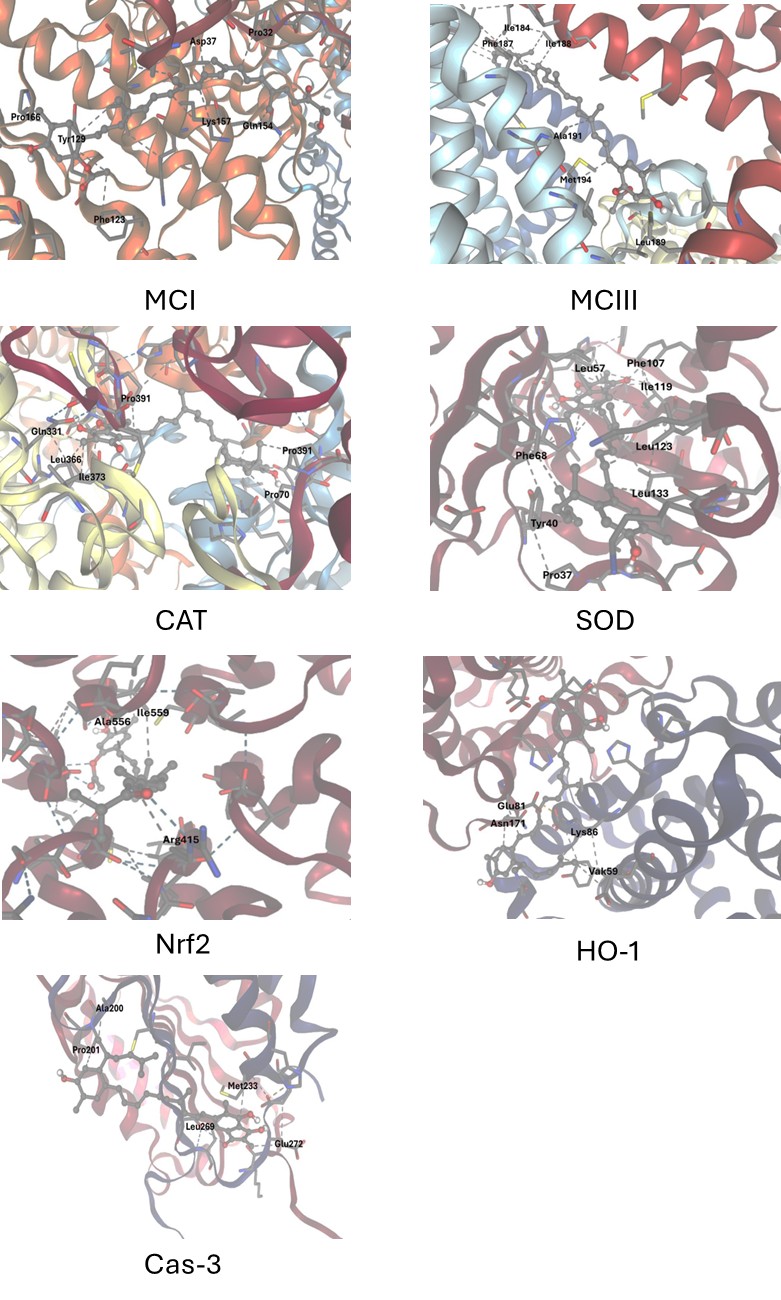


**Figure. S3: Molecular docking interaction of FXL with MCI, MCIII, CAT, SOD, Nrf2, HO-1, and Cas-3.** The colour coding is used to denote different types of molecular interactions: Blue (Hydrogen bonds): Indicates hydrogen bonding interactions between atoms in the protein and ligand, Gray (Hydrophobic contacts): Denotes nonpolar, hydrophobic interactions between the ligand and protein, Green (π-stacking interactions): Highlights stacking interactions between aromatic rings.
